# Supplementary figures and images for: Glucocorticoid-induced TNF receptor-triggered T cells are key modulators for survival/death of neural stem/progenitor cells induced by ischemic stroke
Source: PubMed Central journal article supplement — Cell Death Differ. 2011 Nov 4;19(5):756–67. doi: 10.1038/cdd.2011.145 (PMC3321616; doi:10.1038/cdd.2011.145), 2011-11-04

# Supplemental Figure 1

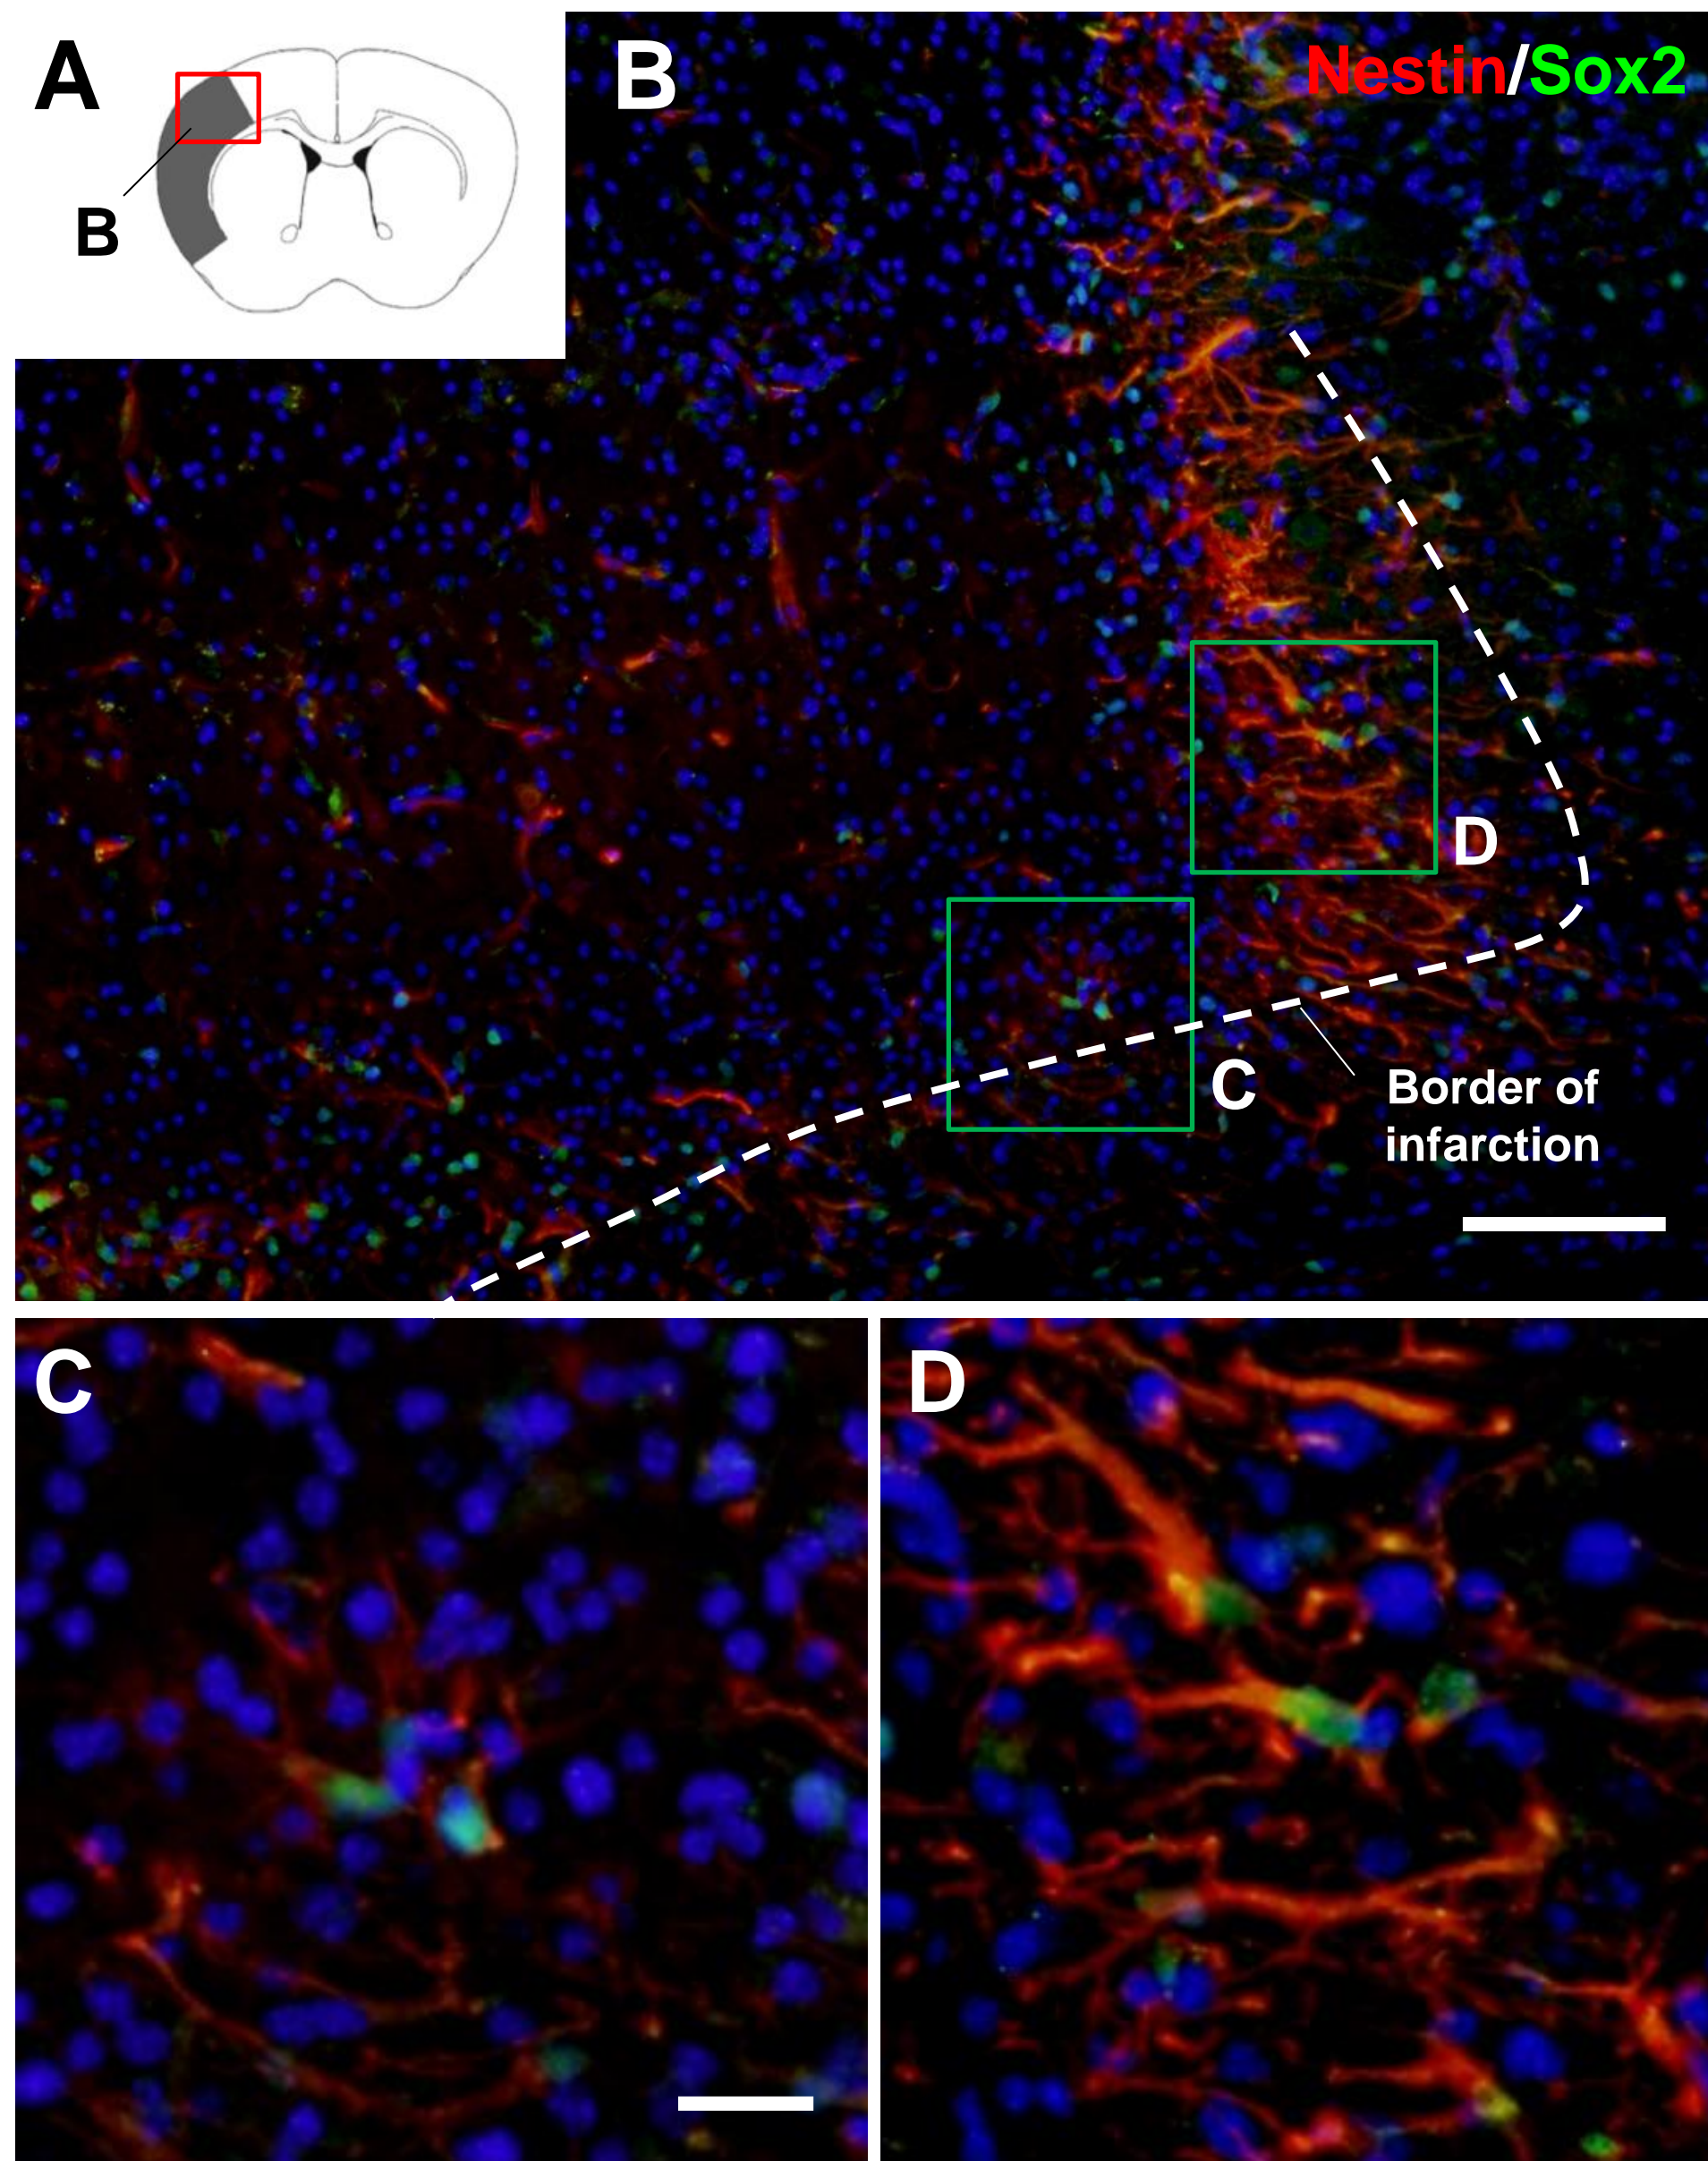

Supplement: cdd2011145x1.pdf [file cdd2011145x1.pdf]

# Supplemental Figure 2

**A**

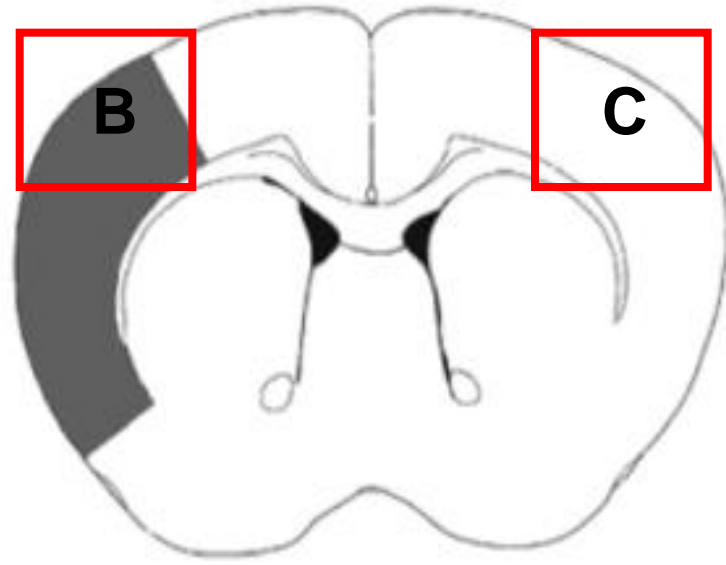

**B**

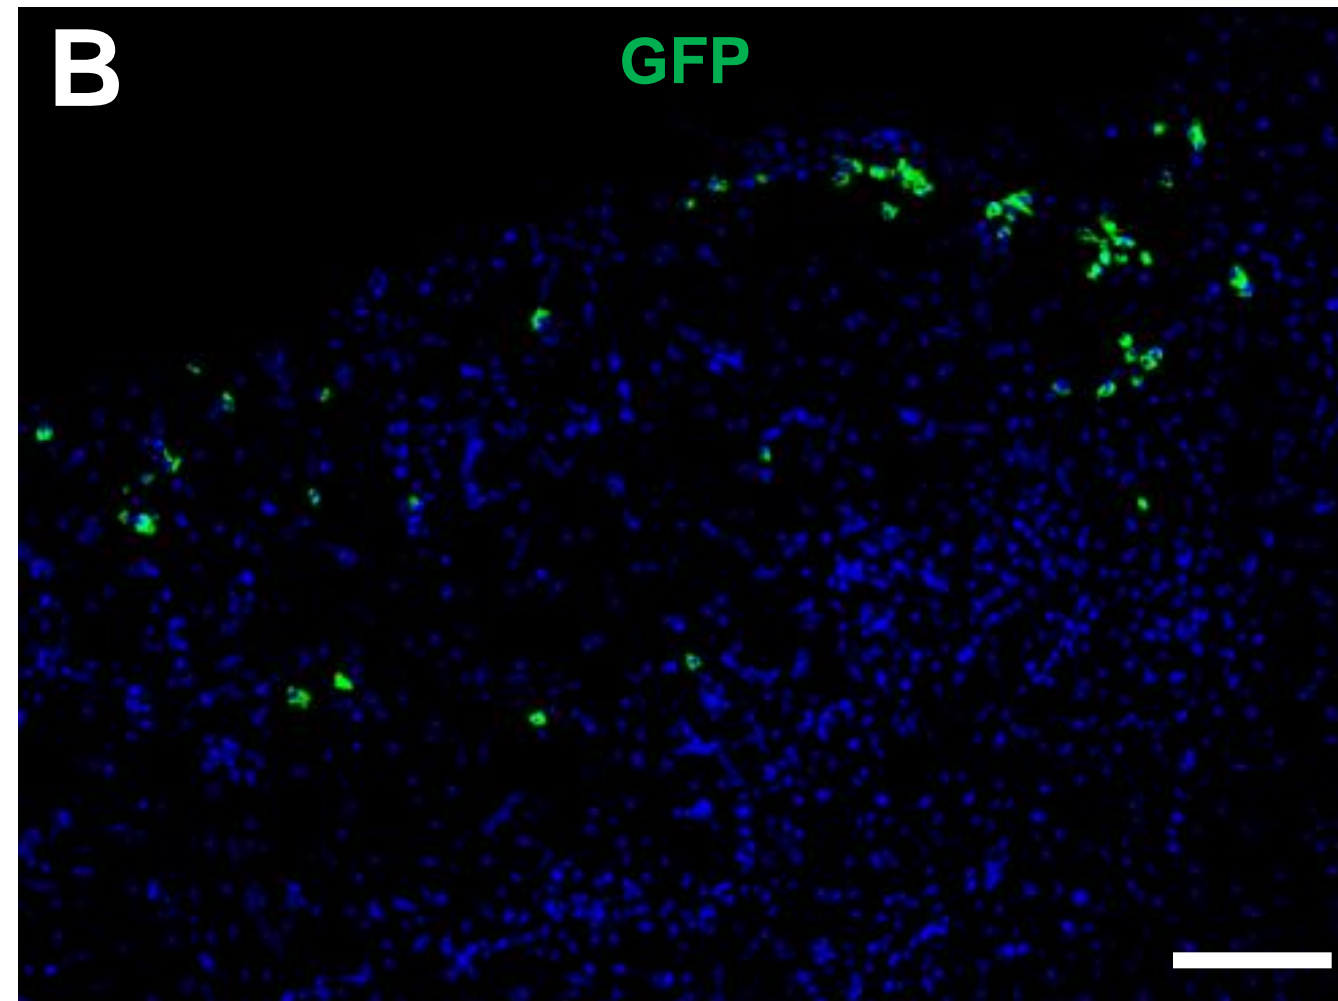

**C**

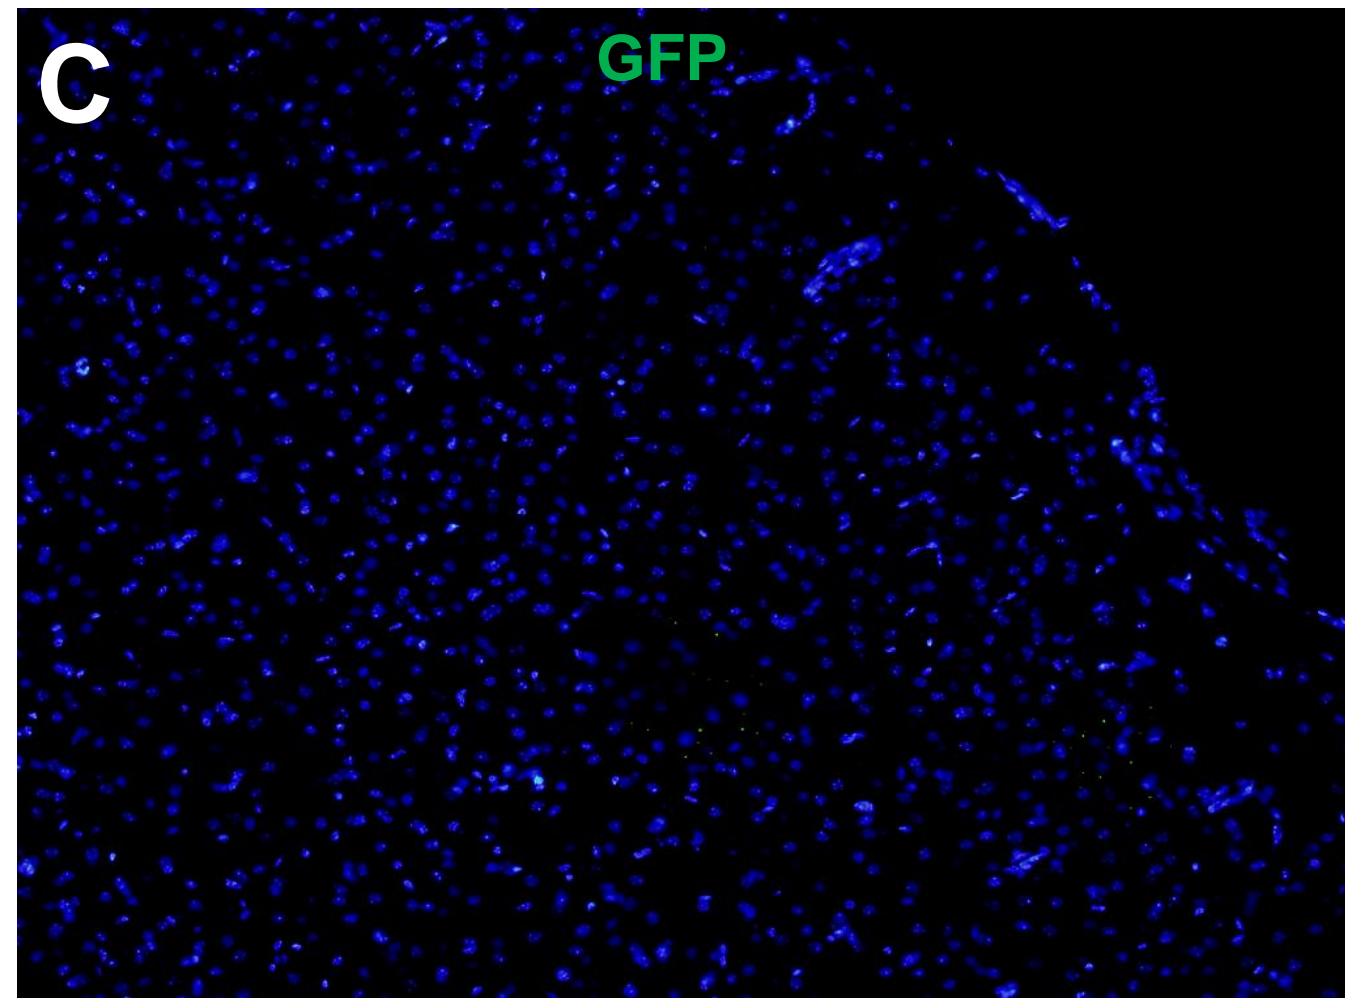

**D**

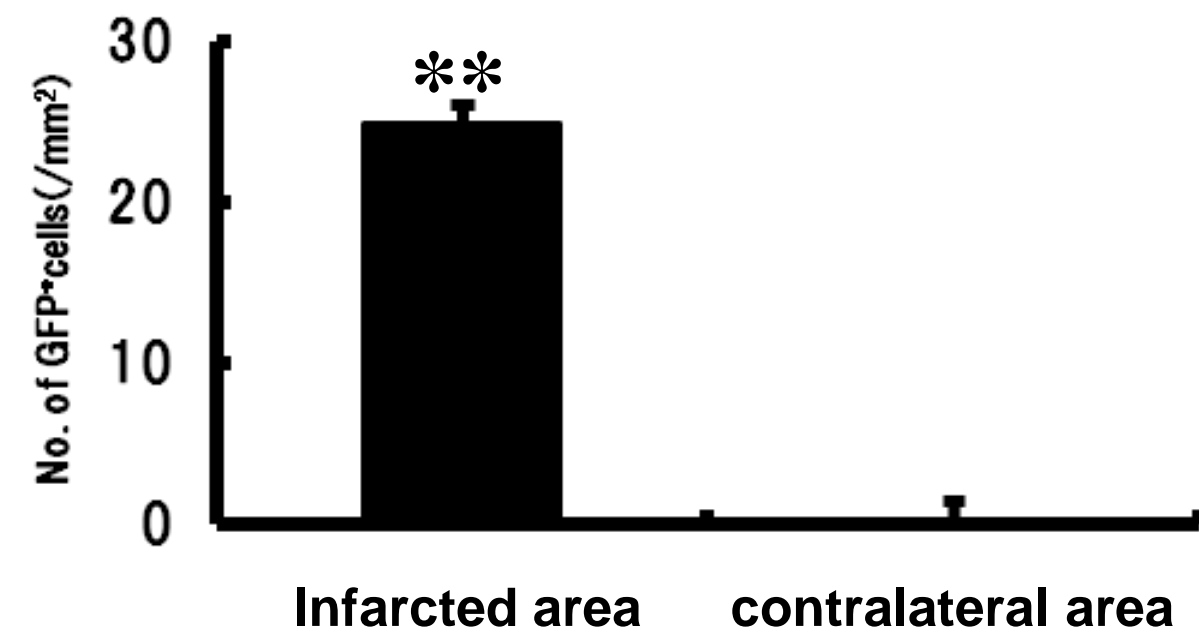

Supplement: cdd2011145x2.pdf [file cdd2011145x2.pdf]

# Supplemental Figure 3

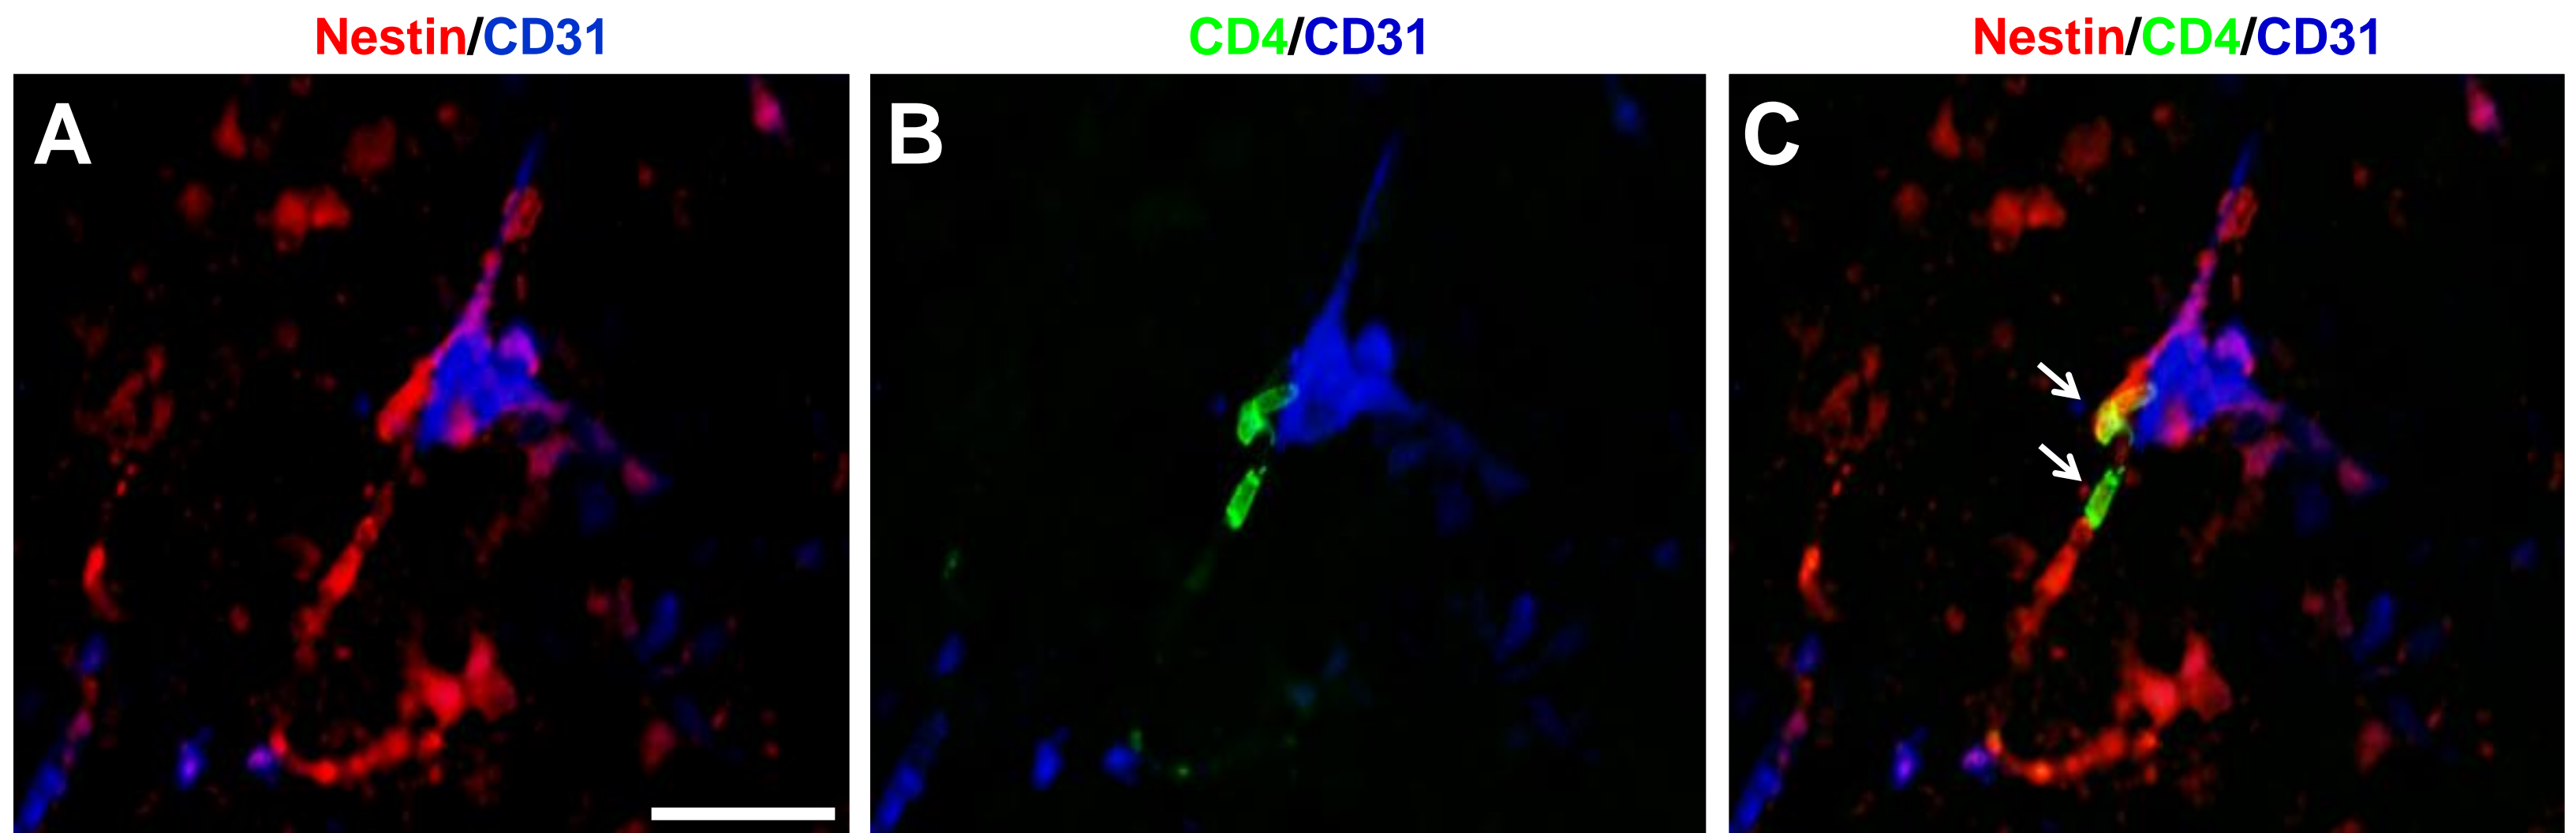

Supplement: cdd2011145x3.pdf [file cdd2011145x3.pdf]
